# Supplementary material for: Serum zonulin as a marker of intestinal mucosal barrier function: May not be what it seems
Source: PLOS journal article supplement (doi:10.1371/journal.pone.0210728), 2019-01-14
Supplement: S1 (10.1371/journal.pone.0210728.s001) [file journal.pone.0210728.s001]

**S1 Table. Plasma or serum CUSABIO and Immundiagnostik commercial assay use in publications.** Google Scholar and PubMed search term: “zonulin.” Content was last updated August 7, 2018.

| Assay   | Author (Year)              | Title                                                                                                                                                    | Journal                                 |
|---------|----------------------------|----------------------------------------------------------------------------------------------------------------------------------------------------------|-----------------------------------------|
| CUSABIO | Çakir M et al. (2017)      | Effects of long-term symbiotic supplementation in addition to lifestyle changes in children with obesity-related non-alcoholic fatty liver disease.      | The Turkish Journal of Gastroenterology |
| CUSABIO | Dong S et al. (2018)       | Protective effect of 1, 25-dihydroxy vitamin D3 on pepsin-trypsin-resistant gliadin-induced tight junction injuries.                                     | Digestive Diseases and Sciences         |
| CUSABIO | Feuerecker M et al. (2016) | Headache under simulated microgravity is related to endocrine, fluid distribution, and tight junction changes.                                           | Pain                                    |
| CUSABIO | Greis C et al. (2017)      | Intestinal T lymphocyte homing is associated with gastric emptying and epithelial barrier function in critically ill: a prospective observational study. | Critical Care                           |
| CUSABIO | Jayashree B et al. (2013)  | Increased circulatory levels of lipopolysaccharide (LPS) and zonulin signify novel biomarkers of proinflammation in patients with type 2 diabetes.       | Molecular and Cellular Biochemistry     |

|                 |                                |                                                                                                                                              |                                                         |
|-----------------|--------------------------------|----------------------------------------------------------------------------------------------------------------------------------------------|---------------------------------------------------------|
| CUSABIO         | Küme T et al.<br>(2017)        | The relationship between serum zonulin level and clinical and laboratory parameters of childhood obesity.                                    | Journal of Clinical Research in Pediatric Endocrinology |
| CUSABIO         | Küme T et al.<br>(2017)        | The relationship between serum zonulin level and clinical and laboratory parameters of childhood obesity.                                    | Journal of Clinical Research in Pediatric Endocrinology |
| CUSABIO         | Mall JPG et al. (2018)         | Are self-reported gastrointestinal symptoms among older adults associated with increased intestinal permeability and psychological distress? | BMC Geriatrics                                          |
| CUSABIO         | Ramos CI et al. (2018)         | Effect of prebiotic (fructooligosaccharide) on uremic toxins of chronic kidney disease patients: a randomized controlled trial.              | Nephrology Dialysis Transplantation                     |
| CUSABIO         | Zhang D et al. (2014)          | Circulating zonulin levels in newly diagnosed Chinese type 2 diabetes patients.                                                              | Diabetes Research and Clinical Practice                 |
| Immundiagnostik | Barceló A et al. (2016)        | Gut epithelial barrier markers in patients with obstructive sleep apnea.                                                                     | Sleep Medicine                                          |
| Immundiagnostik | Carrera-Bastos P et al. (2018) | Serum zonulin and endotoxin levels in exceptional longevity versus precocious myocardial infarction.                                         | Aging and Disease                                       |
| Immundiagnostik | Chuanwei L et al. (2016)       | Zonulin regulates intestinal permeability and facilitates enteric bacteria permeation in coronary artery disease.                            | Scientific Reports                                      |

|                 |                               |                                                                                                                                                                                                                                     |                                            |
|-----------------|-------------------------------|-------------------------------------------------------------------------------------------------------------------------------------------------------------------------------------------------------------------------------------|--------------------------------------------|
| Immundiagnostik | Chwist A et al. (2014)        | A composite model including visfatin, tissue polypeptide-specific antigen, hyaluronic acid, and hematological variables for the diagnosis of moderate-to-severe fibrosis in non-alcoholic fatty liver disease: a preliminary study. | Polish Archives of Internal Medicine       |
| Immundiagnostik | Damms-Machado A et al. (2017) | Gut permeability is related to body weight, fatty liver disease, and insulin resistance in obese individuals undergoing weight reduction.                                                                                           | The American Journal of Clinical Nutrition |
| Immundiagnostik | de Roos et al. (2017)         | The effects of a multispecies probiotic on migraine and markers of intestinal permeability – results of a randomized placebo-controlled study.                                                                                      | European Journal of Clinical Nutrition     |
| Immundiagnostik | Ficek J et al. (2017)         | Relationship between plasma levels of zonulin, bacterial lipopolysaccharides, D-lactate and markers of inflammation in haemodialysis patients.                                                                                      | International Urology and Nephrology       |
| Immundiagnostik | Gentser L et al. (2018)       | Increased jejunal permeability in human obesity is revealed by a lipid challenge and is linked to inflammation and type 2 diabetes.                                                                                                 | The Journal of Pathology                   |
| Immundiagnostik | Gerdes S et al. (2011)        | Zonulin may not be a marker of autoimmunity in patients with psoriasis.                                                                                                                                                             | Acta Dermato Venereologica                 |
| Immundiagnostik | Houttu N et al. (2017)        | Overweight and obesity status in pregnant women are related to intestinal microbiota and serum metabolic and inflammatory profiles                                                                                                  | Clinical Nutrition                         |

|                 |                           |                                                                                                                                                                          |                                                               |
|-----------------|---------------------------|--------------------------------------------------------------------------------------------------------------------------------------------------------------------------|---------------------------------------------------------------|
| Immundiagnostik | Hunt P et al.<br>(2014)   | Gut epithelial barrier dysfunction and innate immune activation predict mortality in treated HIV infection.                                                              | The Journal of Infectious Diseases                            |
| Immundiagnostik | Józefczuk J et al. (2018) | The occurrence of antibodies against gluten in children with autism spectrum disorders does not correlate with serological markers of impaired intestinal permeability.  | Journal of Medicinal Food                                     |
| Immundiagnostik | Karhu E et al. (2017)     | Exercise and gastrointestinal symptoms: running-induced changes in intestinal permeability markers of gastrointestinal function in asymptomatic and symptomatic runners. | European Journal of Applied Physiology                        |
| Immundiagnostik | Kim AS et al. (2018)      | Plasma concentrations of zonulin are elevated in obese men with fatty liver disease.                                                                                     | Diabetes, Metabolic Syndrome and Obesity: Targets and Therapy |
| Immundiagnostik | Kim JH et al. (2018)      | Zonulin level, a marker of intestinal permeability, is increased in association with liver enzymes in young adolescents.                                                 | Clinica Chimica Acta                                          |
| Immundiagnostik | Kim S et al. (2018)       | Imbalance of gut microbiome and intestinal epithelial barrier dysfunction in patients with high blood pressure.                                                          | Clinical Science                                              |
| Immundiagnostik | Klaus DA et al. (2013)    | Increased plasma zonulin levels in patients with sepsis.                                                                                                                 | Biochemica Medica (Zagreb)                                    |

|                 |                            |                                                                                                                                                                                                  |                                                          |
|-----------------|----------------------------|--------------------------------------------------------------------------------------------------------------------------------------------------------------------------------------------------|----------------------------------------------------------|
| Immundiagnostik | Koay WLA et al. (2018)     | Intestinal integrity biomarkers in early antiretroviral-treated perinatally HIV-1-intected infants.                                                                                              | The Journal of Infectious Diseases                       |
| Immundiagnostik | Kvehaugen AS et al. (2018) | Is perceived intolerance to milk and wheat associated with the corresponding IgG and IgA food antibodies? A cross sectional study in subjects with morbid obesity and gastrointestinal symptoms. | BMC Gastroenterology                                     |
| Immundiagnostik | Lamprecht M et al. (2015)  | Effects of zeolite supplementation on parameters of intestinal barrier integrity, inflammation, redoxbiology and performance in aerobically trained subjects.                                    | Journal of the International Society of Sports Nutrition |
| Immundiagnostik | Li C et al. (2016)         | Zonulin regulates intestinal permeability and facilitates enteric bacteria permeation in coronary artery disease.                                                                                | Scientific Reports                                       |
| Immundiagnostik | Łukaszyk E et al. (2018)   | Zonulin, inflammation and iron status in patients with early stages of chronic kidney disease.                                                                                                   | International Urology and Nephrology                     |
| Immundiagnostik | Łukaszyk M et al. (2015)   | Iron status and inflammation in early stages of chronic kidney disease.                                                                                                                          | Kidney and Blood Pressure Research                       |
| Immundiagnostik | Malyszko et al. (2014)     | Zonulin, iron status, and anemia in kidney transplant recipients: are they related?                                                                                                              | Transplantation Proceedings                              |

|                 |                                   |                                                                                                                                                                           |                               |
|-----------------|-----------------------------------|---------------------------------------------------------------------------------------------------------------------------------------------------------------------------|-------------------------------|
| Immundiagnostik | Mokkala K et al. (2016)           | Gut microbiota richness and composition and dietary intake of overweight pregnant women are related to serum zonulin concentration, a marker for intestinal permeability. | The Journal of Nutrition      |
| Immundiagnostik | Mokkala K et al. (2017)           | Evaluation of serum zonulin for use as an early predictor for gestational diabetes.                                                                                       | Nutrition and Diabetes        |
| Immundiagnostik | Mokkala K et al. (2017)           | Increased intestinal permeability, measured by serum zonulin, is associated with metabolic risk markers in overweight pregnant women.                                     | Metabolism                    |
| Immundiagnostik | Mokkala K et al. (2018)           | The impact of probiotics and n-3 long-chain polyunsaturated fatty acids on intestinal permeability in pregnancy: a randomised clinical trial.                             | Beneficial Microbes           |
| Immundiagnostik | Mondal D et al. (2012)            | Contribution of enteric infection, altered intestinal barrier function, and maternal malnutrition to infant malnutrition in Bangladesh.                                   | Clinical Infectious Diseases  |
| Immundiagnostik | Moreno-Navarrete JM et al. (2012) | Circulating zonulin, a marker of intestinal permeability, is increased in association with obesity-associated insulin resistance.                                         | PLoS One                      |
| Immundiagnostik | Mörkl S et al. (2018)             | Gut microbiota, dietary intakes and intestinal permeability reflected by serum zonulin in women.                                                                          | European Journal of Nutrition |

|                 |                            |                                                                                                                                                                            |                                                      |
|-----------------|----------------------------|----------------------------------------------------------------------------------------------------------------------------------------------------------------------------|------------------------------------------------------|
| Immundiagnostik | Muñoz-Cano R et al. (2017) | Distinct transcriptome profiles differentiate NSAID-dependent from NSAID-independent food anaphylaxis.                                                                     | The Journal of Allergy and Clinical Immunology       |
| Immundiagnostik | Mwape I et al. (2017)      | Immunogenicity of rotavirus vaccine (Rotarix <sup>TM</sup> ) in infants with environmental enteric dysfunction.                                                            | PLoS One                                             |
| Immundiagnostik | Ohlsson B et al. (2016)    | Two meals with different carbohydrate, fat and protein contents render equivalent postprandial plasma levels of calprotectin, cortisol, tryglycerides and zonulin.         | International Journal of Food Sciences and Nutrition |
| Immundiagnostik | Ohlsson B et al. (2017)    | Calprotectin in serum and zonulin in serum and feces are elevated after introduction of a diet with lower carbohydrate content and higher fiber, fat and protein contents. | Biomedical Reports                                   |
| Immundiagnostik | Ohlsson B et al. (2017)    | Higher levels of zonulin may rather be associated with increased risk of obesity and hyperlipidemia, than with gastrointestinal symptoms or disease manifestations.        | International Journal of Molecular Sciences          |
| Immundiagnostik | Orlando A et al. (2014)    | Lactobacillus GG restoration of the gliadin induced epithelial barrier disruption: the role of cellular polyamines.                                                        | BMC Microbiology                                     |
| Immundiagnostik | Ott B et al. (2017)        | Effect of caloric restriction on gut permeability, inflammation markers, and fecal microbiota in obese women.                                                              | Scientific Reports                                   |

|                 |                          |                                                                                                                                                                                                                           |                                                       |
|-----------------|--------------------------|---------------------------------------------------------------------------------------------------------------------------------------------------------------------------------------------------------------------------|-------------------------------------------------------|
| Immundiagnostik | Ott B et al.<br>(2018)   | Short-term overfeeding with dairy cream does not modify gut permeability, the fecal microbiota, or glucose metabolism in young healthy men.                                                                               | The Journal of Nutrition                              |
| Immundiagnostik | Pacifico L et al. (2014) | Increased circulating zonulin in children with biopsy-proven non-alcoholic fatty liver disease.                                                                                                                           | World Journal of Gastroenterology                     |
| Immundiagnostik | Pacifico L et al. (2014) | Increased circulating zonulin in children with biopsy-proven non-alcoholic fatty liver disease.                                                                                                                           | World Journal of Gastroenterology                     |
| Immundiagnostik | Pärty A et al. (2017)    | Infantile colic is associated with low-grade systemic inflammation.                                                                                                                                                       | Journal of Pediatric Gastroenterology and Nutrition   |
| Immundiagnostik | Pei R et al. (2017)      | Low-fat yogurt consumption reduces biomarkers of chronic inflammation and inhibits markers of endotoxin exposure in healthy premenopausal women: a randomised controlled trial.                                           | British Journal of Nutrition                          |
| Immundiagnostik | Qi Y et al. (2017)       | Intestinal permeability biomarker zonulin is elevated in healthy aging.                                                                                                                                                   | Journal of the American Medical Directors Association |
| Immundiagnostik | Rees D et al. (2018)     | A randomised, double-blind, cross-over trial to evaluate bread, in which gluten has been pre-digested by prolyl endoprotease treatment, in subjects self-reporting benefits of adopting a gluten-free or low-gluten diet. | British Journal of Nutrition                          |

|                 |                                    |                                                                                                                                                                                                                       |                                       |
|-----------------|------------------------------------|-----------------------------------------------------------------------------------------------------------------------------------------------------------------------------------------------------------------------|---------------------------------------|
| Immundiagnostik | Ruiz-Núñez B et al. (2018)         | Higher prevalence of “low T3 syndrome” in patients with chronic fatigue syndrome: a case-control study.                                                                                                               | Frontiers in Endocrinology (Lausanne) |
| Immundiagnostik | Russo F et al. (2012)              | Inulin-enriched pasta improves intestinal permeability and modifies the circulating levels of zonulin and glucagon-like peptide 2 in healthy young volunteers.                                                        | Nutrition Research                    |
| Immundiagnostik | Russo F et al. (2013)              | The effects of fluorouracil, epirubicin, and cyclophosphamide (FEC60) on the intestinal barrier function and gut peptides in breast cancer patients: an observational study.                                          | BMC Cancer                            |
| Immundiagnostik | Sanches-Alcoholado L et al. (2017) | Role of gut microbiota on cardio-metabolic parameters and immunity in coronary artery disease patients with and without type-2 diabetes mellitus.                                                                     | Frontiers in Microbiology             |
| Immundiagnostik | Scorletti E et al. (2018)          | Design and rationale of the INSYTE study: A randomised, placebo controlled study to test the efficacy of a symbiotic on liver fat, disease biomarkers and intestinal microbiota in non-alcoholic fatty liver disease. | Contemporary Clinical Trials          |
| Immundiagnostik | Sheen YH et al. (2018)             | Serum zonulin is associated with presence and severity of atopic dermatitis in children, independent of total IgE and eosinophil.                                                                                     | Clinical and Experimental Allergy     |

|                 |                            |                                                                                                                                                                                                    |                         |
|-----------------|----------------------------|----------------------------------------------------------------------------------------------------------------------------------------------------------------------------------------------------|-------------------------|
| Immundiagnostik | Šket R et al.<br>(2017)    | Hypoxia and inactivity related physiological changes (constipation, inflammation) are not reflected at the level of gut metabolites and butyrate producing microbial community; the PlanHab Study. | Frontiers in Physiology |
| Immundiagnostik | Stadlbauer V et al. (2015) | Lactobacillus casei Shirota supplementation does not restore gut microbiota composition and gut barrier in metabolic syndrome: a randomized pilot study.                                           | PLoS One                |
| Immundiagnostik | Stenman LK et al. (2016)   | Probiotic with or without fiber controls body fat mass, associated with serum zonulin, in overweight and obese adults – randomized controlled trial.                                               | EBioMedicine            |
| Immundiagnostik | Stevens BR et al. (2018)   | Increased human intestinal barrier permeability plasma and FABP2 correlated with plasma LPS and altered gut microbiome in anxiety and depression.                                                  | Gut                     |
| Immundiagnostik | Strewe C et al. (2018)     | PlanHab Study: Consequences of combined normobaric hypoxia and bed rest on adenosine kinetics.                                                                                                     | Scientific Reports      |
| Immundiagnostik | Tarko A et al. (2017)      | Zonulin: a potential marker of intestinal injury in newborns.                                                                                                                                      | Disease Markers         |

|                 |                              |                                                                                                                                                |                                                               |
|-----------------|------------------------------|------------------------------------------------------------------------------------------------------------------------------------------------|---------------------------------------------------------------|
| Immundiagnostik | Wilms E et al.<br>(2016)     | Effects of supplementation of the Synbiotic Ecologic® 825/FOS P6 on intestinal barrier function in healthy humans: a randomized control trial. | PLoS One                                                      |
| Immundiagnostik | Wosiewicz P<br>et al. (2016) | Portal vein thrombosis in cirrhosis is not associated with intestinal barrier disruption or increased platelet aggregability.                  | Clinics and Research<br>in Hepatology and<br>Gastroenterology |
| Immundiagnostik | Żak-Gołąb A<br>et al. (2013) | Gut microbiota, microinflammation, metabolic profile and zonulin concentration in obese and normal weight subjects.                            | International Journal<br>of Endocrinology                     |
| Immundiagnostik | Zhang D et al.<br>(2015)     | Serum zonulin is elevated in women with polycystic ovary syndrome and correlates with insulin resistance and severity of anovulation.          | European Journal of<br>Endocrinology                          |
